# Supplementary material for: Three pairs of luminescent coordination polymers based on CoII and CdII clusters for the detection of antibiotics, pesticides and chiral nitro aromatic compounds
Source: Royal Society of Chemistry journal article supplement (doi:10.1039/d0ra00329h), 2020-01-01
Supplement: d0ra00329h1.pdf [file d0ra00329h1.pdf]

## Supporting Information

### Three pairs of luminescent chiral coordination polymers based on Co<sup>II</sup> and Cd<sup>II</sup> clusters for the detection of antibiotic pesticides and enantiomeric identification

Li-Qing Zhang,<sup>a</sup> Xiu-Wen Wang,<sup>a</sup> Lei Gu,<sup>a</sup> Ying-Hui Yu,<sup>\*a</sup> and Jin-Sheng Gao<sup>\*ab</sup>

<sup>a</sup>School of Chemistry and Materials Science, Heilongjiang University, Harbin 150080, China

<sup>b</sup>Agricultural college, Heilongjiang University, Harbin 150080, China

\*Corresponding author. E-mail: [yuyinghui@hlju.edu.cn](mailto:yuyinghui@hlju.edu.cn); [gaojinsheng@hlju.edu.cn](mailto:gaojinsheng@hlju.edu.cn);

Tel: +86-451-86609001; Fax: +86-451-86609151.

### Catalog

|                                                              |            |
|--------------------------------------------------------------|------------|
| Section 1. Crystal structure information .....               | Table      |
| S1                                                           |            |
| Section 2. General characterizations .....                   | Figure S2  |
| Section 3. Detection of antibiotics .....                    | Figure S7  |
| Section 4. Detection of pesticides .....                     | Figure S13 |
| Section 5. Detection of chiral nitro aromatic compounds..... | Figure S20 |

## Section 1. Crystal structure information

Table S1. Crystal data and structure refinement for CPs 1-3.

|                                                                              | 1-D                                | 1-L                                | 2-D                                              | 2-L                                              | 3-D                                             | 3-L                                             |
|------------------------------------------------------------------------------|------------------------------------|------------------------------------|--------------------------------------------------|--------------------------------------------------|-------------------------------------------------|-------------------------------------------------|
| <b>Empirical formula</b>                                                     | C <sub>28</sub> H <sub>22</sub> Co | C <sub>28</sub> H <sub>22</sub> Co | C <sub>124</sub> H <sub>98</sub> Cd <sub>6</sub> | C <sub>124</sub> H <sub>98</sub> Cd <sub>6</sub> | C <sub>50</sub> H <sub>40</sub> Cd <sub>2</sub> | C <sub>50</sub> H <sub>40</sub> Cd <sub>2</sub> |
| <b>Formula weight</b>                                                        | 577.39                             | 577.39                             | 2990.54                                          | 2990.54                                          | 1177.66                                         | 1177.66                                         |
| <b>Crystal system</b>                                                        | Monoclinic                         | Monoclinic                         | Monoclinic                                       | Monoclinic                                       | Monoclinic                                      | Monoclinic                                      |
| <b>Space group</b>                                                           | P2 <sub>1</sub>                    | P2 <sub>1</sub>                    | P2 <sub>1</sub>                                  | P2 <sub>1</sub>                                  | P2 <sub>1</sub>                                 | P2 <sub>1</sub>                                 |
| <b>a (Å)</b>                                                                 | 4.5150(10)                         | 4.5099(10)                         | 10.7966(4)                                       | 10.7678(12)                                      | 10.0363(3)                                      | 10.0826(9)                                      |
| <b>b (Å)</b>                                                                 | 20.3360(5)                         | 20.3181(7)                         | 42.8603(17)                                      | 43.169(5)                                        | 22.7634(8)                                      | 22.830(2)                                       |
| <b>c (Å)</b>                                                                 | 13.1788(4)                         | 13.1808(5)                         | 13.9138(6)                                       | 14.1953(16)                                      | 11.2352(3)                                      | 11.2518(9)                                      |
| <b>α (°)</b>                                                                 | 90                                 | 90                                 | 90                                               | 90                                               | 90                                              | 90                                              |
| <b>β (°)</b>                                                                 | 95.541(10)                         | 95.614(10)                         | 101.311(2)                                       | 102.803(4)                                       | 101.676(10)                                     | 101.852(3)                                      |
| <b>γ (°)</b>                                                                 | 90                                 | 90                                 | 90                                               | 90                                               | 90                                              | 90                                              |
| <b>V (Å<sup>3</sup>)</b>                                                     | 1204.38(5)                         | 1202.00(7)                         | 6313.5(4)                                        | 6434.5(12)                                       | 2513.68(13)                                     | 2534.8(4)                                       |
| <b>Z</b>                                                                     | 2                                  | 2                                  | 2                                                | 2                                                | 2                                               | 2                                               |
| <b>D<sub>calc</sub> (g.cm<sup>-3</sup>)</b>                                  | 1.592                              | 1.595                              | 1.573                                            | 1.544                                            | 1.556                                           | 1.543                                           |
| <b>μ (mm<sup>-1</sup>)</b>                                                   | 0.776                              | 0.777                              | 1.075                                            | 1.055                                            | 0.920                                           | 0.912                                           |
| <b>F(0 0 0)</b>                                                              | 594                                | 594                                | 2988                                             | 2988                                             | 1184                                            | 1184                                            |
| <b>collected/unique</b>                                                      | 15713 / 5871                       | 26224 / 5901                       | 61623 / 30219                                    | 99283 / 31848                                    | 35969 / 12424                                   | 24662 / 11480                                   |
| <b>R(int)</b>                                                                | 0.0225                             | 0.0235                             | 0.0452                                           | 0.0364                                           | 0.0217                                          | 0.0459                                          |
| <b>GOF on F<sup>2</sup></b>                                                  | 0.977                              | 0.989                              | 1.027                                            | 1.038                                            | 1.018                                           | 1.049                                           |
| <b>R<sub>1</sub><sup>a</sup>, wR<sub>2</sub><sup>b</sup>, [I &gt; 2σ(I)]</b> | 0.0245, 0.0551                     | 0.0228, 0.0571                     | 0.0727, 0.1870                                   | 0.0509, 0.1284                                   | 0.0342, 0.0896                                  | 0.0597, 0.1443                                  |
| <b>R<sub>1</sub><sup>a</sup>, wR<sub>2</sub><sup>b</sup>, (all data)</b>     | 0.0277, 0.0563                     | 0.0241, 0.0578                     | 0.0959, 0.1992                                   | 0.0637, 0.1348                                   | 0.0374, 0.0915                                  | 0.0940, 0.1700                                  |

<sup>a</sup>R<sub>1</sub> = (Σ||F<sub>o</sub>| - |F<sub>c</sub>|)/Σ|F<sub>o</sub>|. <sup>b</sup>wR<sub>2</sub> = [Σw(F<sub>o</sub><sup>2</sup> - F<sub>c</sub><sup>2</sup>)/Σw(F<sub>o</sub><sup>2</sup>)]<sup>1/2</sup>

Table S2. Selected bond distances (Å) and angles (°) for CPs 1-3.

| 1-D                                         |            |                                               |            |
|---------------------------------------------|------------|-----------------------------------------------|------------|
| Co(1)-O(4) <sup>I</sup>                     | 2.0711(11) | Co(1)-O(5) <sup>II</sup>                      | 2.0822(11) |
| Co(1)-O(10) <sup>III</sup>                  | 2.0878(11) | Co(1)-O(6)                                    | 2.0949(11) |
| Co(1)-O(9) <sup>IV</sup>                    | 2.0950(11) | Co(1)-O(1)                                    | 2.1320(11) |
| O(4)-Co(1) <sup>V</sup>                     | 2.0711(11) | O(5)-Co(1) <sup>VI</sup>                      | 2.0822(11) |
| O(9)-Co(1) <sup>VII</sup>                   | 2.0950(11) | O(10)-Co(1) <sup>VIII</sup>                   | 2.0878(11) |
| O(4) <sup>I</sup> -Co(1)-O(5) <sup>II</sup> | 86.23(5)   | O(4) <sup>I</sup> -Co(1)-O(10) <sup>III</sup> | 97.30(5)   |

|                                                |                     |                                              |           |
|------------------------------------------------|---------------------|----------------------------------------------|-----------|
| O(5) <sup>II</sup> -Co(1)-O(10) <sup>III</sup> | 176.13(5)           | O(4) <sup>I</sup> -Co(1)-O(6)                | 95.59(5)  |
| O(5) <sup>II</sup> -Co(1)-O(6)                 | 90.88(4)            | O(10) <sup>III</sup> -Co(1)-O(6)             | 90.34(4)  |
| O(4) <sup>I</sup> -Co(1)-O(9) <sup>IV</sup>    | 177.17(5)           | O(5) <sup>II</sup> -Co(1)-O(9) <sup>IV</sup> | 90.97(5)  |
| O(10) <sup>III</sup> -Co(1)-O(9) <sup>IV</sup> | 85.48(5)            | O(6)-Co(1)-O(9) <sup>IV</sup>                | 84.88(5)  |
| O(4) <sup>I</sup> -Co(1)-O(1)                  | 89.26(5)            | O(5) <sup>II</sup> -Co(1)-O(1)               | 90.86(4)  |
| O(10) <sup>III</sup> -Co(1)-O(1)               | 87.63(4)            | O(6)-Co(1)-O(1)                              | 174.95(5) |
| O(9) <sup>IV</sup> -Co(1)-O(1)                 | 90.35(5)            |                                              |           |
| Symmetry code: I: -x+1,y+1/2,-z+1              | II: -x+2,y+1/2,-z+1 | III: -x-1,y-1/2,-z                           |           |
| IV: -x,y-1/2,-z                                | V: -x+1,y-1/2,-z+1  | VI: -x+2,y-1/2,-z+1                          |           |
| VII: -x,y+1/2,-z                               | VIII: -x-1,y+1/2,-z |                                              |           |

### 1-L

|                                                |                       |                                               |            |
|------------------------------------------------|-----------------------|-----------------------------------------------|------------|
| Co(1)-O(4) <sup>I</sup>                        | 2.0703(10)            | Co(1)-O(5) <sup>II</sup>                      | 2.0793(11) |
| Co(1)-O(10) <sup>III</sup>                     | 2.0885(11)            | Co(1)-O(6)                                    | 2.0928(11) |
| Co(1)-O(9) <sup>IV</sup>                       | 2.0952(10)            | Co(1)-O(1)                                    | 2.1309(11) |
| O(4)-Co(1) <sup>V</sup>                        | 2.0703(10)            | O(5)-Co(1) <sup>VI</sup>                      | 2.0793(11) |
| O(9)-Co(1) <sup>VII</sup>                      | 2.0952(10)            | O(10)-Co(1) <sup>VIII</sup>                   | 2.0885(10) |
| O(4) <sup>I</sup> -Co(1)-O(5) <sup>II</sup>    | 86.22(4)              | O(4) <sup>I</sup> -Co(1)-O(10) <sup>III</sup> | 97.41(5)   |
| O(5) <sup>II</sup> -Co(1)-O(10) <sup>III</sup> | 176.04(5)             | O(4) <sup>I</sup> -Co(1)-O(6)                 | 95.78(5)   |
| O(5) <sup>II</sup> -Co(1)-O(6)                 | 90.89(4)              | O(10) <sup>III</sup> -Co(1)-O(6)              | 90.30(5)   |
| O(4) <sup>I</sup> -Co(1)-O(9) <sup>IV</sup>    | 177.09(4)             | O(5) <sup>II</sup> -Co(1)-O(9) <sup>IV</sup>  | 90.90(4)   |
| O(10) <sup>III</sup> -Co(1)-O(9) <sup>IV</sup> | 85.45(4)              | O(6)-Co(1)-O(9) <sup>IV</sup>                 | 84.72(5)   |
| O(4) <sup>I</sup> -Co(1)-O(1)                  | 89.14(5)              | O(5) <sup>II</sup> -Co(1)-O(1)                | 90.85(4)   |
| O(10) <sup>III</sup> -Co(1)-O(1)               | 87.65(4)              | O(6)-Co(1)-O(1)                               | 174.88(5)  |
| O(9) <sup>IV</sup> -Co(1)-O(1)                 | 90.44(5)              |                                               |            |
| Symmetry code: I: -x+1,y-1/2,-z+2              | II: -x+2,y-1/2,-z+2   | III: -x-1,y+1/2,-z+1                          |            |
| IV: -x,y+1/2,-z+1                              | V: -x+1,y+1/2,-z+2    | VI: -x+2,y+1/2,-z+2                           |            |
| VII: -x,y-1/2,-z+1                             | VIII: -x-1,y-1/2,-z+1 |                                               |            |

### 2-D

|                           |           |                          |           |
|---------------------------|-----------|--------------------------|-----------|
| Cd(1)-O(5) <sup>I</sup>   | 2.214(12) | Cd(1)-O(1)               | 2.408(10) |
| Cd(1)-O(2)                | 2.430(9)  | Cd(1)-O(6) <sup>I</sup>  | 2.615(13) |
| Cd(2)-O(11)               | 2.362(10) | Cd(2)-O(4)               | 2.367(9)  |
| Cd(2)-O(12)               | 2.492(13) | Cd(2)-O(3)               | 2.501(9)  |
| Cd(3)-O(22) <sup>I</sup>  | 2.224(9)  | Cd(3)-O(18)              | 2.379(6)  |
| Cd(3)-O(17)               | 2.408(8)  | Cd(4)-O(13)              | 2.286(9)  |
| Cd(4)-O(10) <sup>II</sup> | 2.300(9)  | Cd(4)-O(19)              | 2.358(9)  |
| Cd(4)-O(14)               | 2.520(14) | Cd(4)-O(20)              | 2.547(9)  |
| Cd(5)-O(9) <sup>II</sup>  | 2.210(8)  | Cd(5)-O(20)              | 2.249(8)  |
| Cd(5)-O(26)               | 2.289(11) | Cd(5)-O(25)              | 2.468(11) |
| Cd(6)-O(29)               | 2.334(8)  | Cd(6)-O(27) <sup>I</sup> | 2.343(10) |
| Cd(6)-O(30)               | 2.355(8)  | Cd(6)-O(28) <sup>I</sup> | 2.362(10) |
| O(5)-Cd(1) <sup>II</sup>  | 2.214(12) | O(6)-Cd(1) <sup>II</sup> | 2.615(13) |
| O(9)-Cd(5) <sup>I</sup>   | 2.210(8)  | O(10)-Cd(4) <sup>I</sup> | 2.300(9)  |

|                                              |           |                                            |           |
|----------------------------------------------|-----------|--------------------------------------------|-----------|
| O(22)-Cd(3) <sup>II</sup>                    | 2.224(9)  | O(27)-Cd(6) <sup>II</sup>                  | 2.343(10) |
| O(28)-Cd(6) <sup>II</sup>                    | 2.362(10) | Cd(1)-O(1W)                                | 2.326(10) |
| Cd(2)-O(2W)                                  | 2.287(8)  | Cd(3)-O(3W)                                | 2.288(11) |
| Cd(1)-N(2)                                   | 2.332(8)  | Cd(1)-N(1)                                 | 2.377(9)  |
| Cd(2)-N(3)                                   | 2.329(7)  | Cd(2)-N(4)                                 | 2.354(8)  |
| Cd(3)-N(5)                                   | 2.306(9)  | Cd(3)-N(6)                                 | 2.363(9)  |
| Cd(4)-N(7)                                   | 2.355(7)  | Cd(4)-N(8)                                 | 2.396(8)  |
| Cd(5)-N(9)                                   | 2.352(10) | Cd(5)-N(10)                                | 2.298(8)  |
| Cd(6)-N(11)                                  | 2.341(9)  | Cd(6)-N(12)                                | 2.274(9)  |
| O(5) <sup>I</sup> -Cd(1)-O(1)                | 144.1(4)  | O(5) <sup>I</sup> -Cd(1)-O(2)              | 89.5(4)   |
| O(1)-Cd(1)-O(2)                              | 54.8(3)   | O(5) <sup>I</sup> -Cd(1)-O(6) <sup>I</sup> | 50.0(5)   |
| O(1)-Cd(1)-O(6) <sup>I</sup>                 | 121.4(5)  | O(2)-Cd(1)-O(6) <sup>I</sup>               | 85.6(4)   |
| O(11)-Cd(2)-O(4)                             | 114.8(4)  | O(11)-Cd(2)-O(12)                          | 53.5(3)   |
| O(4)-Cd(2)-O(12)                             | 87.8(4)   | O(11)-Cd(2)-O(3)                           | 75.0(4)   |
| O(4)-Cd(2)-O(3)                              | 52.0(4)   | O(12)-Cd(2)-O(3)                           | 89.6(4)   |
| O(22) <sup>I</sup> -Cd(3)-O(18)              | 149.3(3)  | O(22) <sup>I</sup> -Cd(3)-O(17)            | 96.5(3)   |
| O(18)-Cd(3)-O(17)                            | 54.4(2)   | O(13)-Cd(4)-O(10) <sup>II</sup>            | 93.4(4)   |
| O(13)-Cd(4)-O(19)                            | 95.1(3)   | O(10) <sup>II</sup> -Cd(4)-O(19)           | 90.8(4)   |
| O(13)-Cd(4)-O(14)                            | 52.7(4)   | O(10) <sup>II</sup> -Cd(4)-O(14)           | 143.1(3)  |
| O(19)-Cd(4)-O(14)                            | 79.7(4)   | O(13)-Cd(4)-O(20)                          | 145.9(3)  |
| O(10) <sup>II</sup> -Cd(4)-O(20)             | 80.7(3)   | O(19)-Cd(4)-O(20)                          | 51.7(3)   |
| O(14)-Cd(4)-O(20)                            | 117.9(4)  | O(9) <sup>II</sup> -Cd(5)-O(20)            | 87.0(3)   |
| O(9) <sup>II</sup> -Cd(5)-O(26)              | 95.3(4)   | O(20)-Cd(5)-O(26)                          | 148.7(3)  |
| O(9) <sup>II</sup> -Cd(5)-O(25)              | 103.7(4)  | O(20)-Cd(5)-O(25)                          | 95.2(3)   |
| O(26)-Cd(5)-O(25)                            | 53.9(3)   | O(29)-Cd(6)-O(27) <sup>I</sup>             | 132.0(3)  |
| O(27) <sup>I</sup> -Cd(6)-O(30)              | 91.1(3)   | O(29)-Cd(6)-O(28) <sup>I</sup>             | 111.3(4)  |
| O(27) <sup>I</sup> -Cd(6)-O(28) <sup>I</sup> | 52.9(3)   | O(30)-Cd(6)-O(28) <sup>I</sup>             | 120.5(4)  |
| O(5) <sup>I</sup> -Cd(1)-O(1W)               | 126.7(5)  | O(1W)-Cd(1)-O(1)                           | 70.8(4)   |
| O(1W)-Cd(1)-O(2)                             | 101.3(4)  | O(1W)-Cd(1)-O(6) <sup>I</sup>              | 78.6(5)   |
| O(2W)-Cd(2)-O(11)                            | 128.3(3)  | O(2W)-Cd(2)-O(4)                           | 85.5(4)   |
| O(2W)-Cd(2)-O(12)                            | 82.5(3)   | O(2W)-Cd(2)-O(3)                           | 137.0(4)  |
| O(22) <sup>I</sup> -Cd(3)-O(3W)              | 106.8(5)  | O(3W)-Cd(3)-O(18)                          | 89.7(4)   |
| O(3W)-Cd(3)-O(17)                            | 100.4(4)  | O(5) <sup>I</sup> -Cd(1)-N(2)              | 84.6(4)   |
| O(1W)-Cd(1)-N(2)                             | 145.5(4)  | O(5) <sup>I</sup> -Cd(1)-N(1)              | 98.2(4)   |
| O(1W)-Cd(1)-N(1)                             | 88.5(4)   | O(2W)-Cd(2)-N(3)                           | 86.6(3)   |
| O(2W)-Cd(2)-N(4)                             | 103.5(3)  | O(22) <sup>I</sup> -Cd(3)-N(5)             | 110.8(3)  |
| O(3W)-Cd(3)-N(5)                             | 87.6(4)   | O(22) <sup>I</sup> -Cd(3)-N(6)             | 94.4(4)   |
| O(3W)-Cd(3)-N(6)                             | 154.0(4)  | O(13)-Cd(4)-N(7)                           | 86.6(3)   |
| O(10) <sup>II</sup> -Cd(4)-N(7)              | 89.6(3)   | O(13)-Cd(4)-N(8)                           | 131.2(3)  |
| O(10) <sup>II</sup> -Cd(4)-N(8)              | 126.4(3)  | O(19)-Cd(4)-N(8)                           | 109.4(3)  |
| O(9) <sup>II</sup> -Cd(5)-N(10)              | 164.9(4)  | O(20)-Cd(5)-N(10)                          | 92.9(3)   |
| O(26)-Cd(5)-N(10)                            | 92.6(3)   | O(9) <sup>II</sup> -Cd(5)-N(9)             | 94.4(4)   |
| O(20)-Cd(5)-N(9)                             | 101.9(3)  | O(26)-Cd(5)-N(9)                           | 109.1(3)  |
| O(29)-Cd(6)-N(11)                            | 93.8(3)   | N(2)-Cd(1)-N(1)                            | 71.1(3)   |

|                                       |          |                                |          |
|---------------------------------------|----------|--------------------------------|----------|
| N(3)-Cd(2)-N(4)                       | 71.2(2)  | N(5)-Cd(3)-N(6)                | 70.6(3)  |
| N(7)-Cd(4)-N(8)                       | 69.0(3)  | N(10)-Cd(5)-N(9)               | 70.8(3)  |
| N(12)-Cd(6)-N(11)                     | 73.9(4)  | N(2)-Cd(1)-O(1)                | 92.4(3)  |
| N(1)-Cd(1)-O(1)                       | 114.7(3) | N(2)-Cd(1)-O(2)                | 92.0(3)  |
| N(1)-Cd(1)-O(2)                       | 160.6(3) | N(2)-Cd(1)-O(6) <sup>I</sup>   | 134.6(4) |
| N(1)-Cd(1)-O(6) <sup>I</sup>          | 112.9(4) | N(3)-Cd(2)-O(11)               | 85.2(3)  |
| N(4)-Cd(2)-O(11)                      | 121.5(3) | N(3)-Cd(2)-O(4)                | 159.0(4) |
| N(4)-Cd(2)-O(4)                       | 91.9(3)  | N(3)-Cd(2)-O(12)               | 110.4(3) |
| N(4)-Cd(2)-O(12)                      | 173.9(3) | N(3)-Cd(2)-O(3)                | 135.1(3) |
| N(4)-Cd(2)-O(3)                       | 85.4(3)  | N(5)-Cd(3)-O(18)               | 95.2(2)  |
| N(6)-Cd(3)-O(18)                      | 78.8(3)  | N(5)-Cd(3)-O(17)               | 148.1(2) |
| N(6)-Cd(3)-O(17)                      | 91.8(3)  | N(7)-Cd(4)-O(19)               | 178.2(3) |
| N(7)-Cd(4)-O(14)                      | 101.0(4) | N(8)-Cd(4)-O(14)               | 90.2(3)  |
| N(7)-Cd(4)-O(20)                      | 126.6(3) | N(8)-Cd(4)-O(20)               | 75.4(3)  |
| N(9)-Cd(5)-O(25)                      | 155.7(3) | N(10)-Cd(5)-O(25)              | 91.3(4)  |
| N(11)-Cd(6)-O(27) <sup>I</sup>        | 127.1(3) | N(11)-Cd(6)-O(30)              | 141.6(3) |
| N(11)-Cd(6)-O(28) <sup>I</sup>        | 90.5(4)  | N(12)-Cd(6)-O(27) <sup>I</sup> | 100.1(4) |
| N(12)-Cd(6)-O(28) <sup>I</sup>        | 130.2(4) | N(12)-Cd(6)-O(29)              | 116.6(3) |
| N(12)-Cd(6)-O(30)                     | 97.7(3)  |                                |          |
| Symmetry code: I: x+1,y,z II: x-1,y,z |          |                                |          |

## 2-L

|                           |           |                          |           |
|---------------------------|-----------|--------------------------|-----------|
| Cd(1)-O(4) <sup>I</sup>   | 2.277(5)  | Cd(1)-O(2)               | 2.336(5)  |
| Cd(1)-O(1)                | 2.355(5)  | Cd(1)-O(5) <sup>I</sup>  | 2.455(5)  |
| Cd(2)-O(24) <sup>II</sup> | 2.188(5)  | Cd(2)-O(12)              | 2.271(5)  |
| Cd(2)-O(8)                | 2.336(5)  | Cd(2)-O(7)               | 2.430(6)  |
| Cd(3)-O(18)               | 2.272(4)  | Cd(3)-O(12)              | 2.348(5)  |
| Cd(3)-O(23) <sup>II</sup> | 2.360(4)  | Cd(3)-O(13)              | 2.514(5)  |
| Cd(3)-O(17)               | 2.550(5)  | Cd(4)-O(9) <sup>I</sup>  | 2.242(6)  |
| Cd(4)-O(16)               | 2.372(6)  | Cd(4)-O(15)              | 2.390(5)  |
| Cd(5)-O(21)               | 2.337(6)  | Cd(5)-O(29)              | 2.387(6)  |
| Cd(5)-O(28)               | 2.515(6)  | Cd(5)-O(20)              | 2.543(10) |
| Cd(6)-O(26) <sup>I</sup>  | 2.316(13) | Cd(6)-O(32)              | 2.396(7)  |
| Cd(6)-O(25) <sup>I</sup>  | 2.439(12) | Cd(6)-O(31)              | 2.464(7)  |
| Cd(4)-O(1W)               | 2.305(7)  | Cd(6)-O(2W)              | 2.327(7)  |
| Cd(5)-O(3W)               | 2.292(5)  | Cd(1)-N(1)               | 2.302(6)  |
| Cd(1)-N(2)                | 2.303(6)  | Cd(2)-N(3)               | 2.312(5)  |
| Cd(2)-N(4)                | 2.343(5)  | Cd(3)-N(6)               | 2.353(5)  |
| Cd(3)-N(5)                | 2.394(5)  | Cd(4)-N(7)               | 2.326(6)  |
| Cd(4)-N(8)                | 2.390(6)  | Cd(5)-N(9)               | 2.358(5)  |
| Cd(5)-N(10)               | 2.348(5)  | Cd(6)-N(11)              | 2.345(5)  |
| Cd(6)-N(12)               | 2.339(6)  | O(4)-Cd(1) <sup>II</sup> | 2.277(5)  |
| O(5)-Cd(1) <sup>II</sup>  | 2.455(5)  | O(9)-Cd(4) <sup>II</sup> | 2.242(6)  |
| O(23)-Cd(3) <sup>I</sup>  | 2.360(4)  | O(24)-Cd(2) <sup>I</sup> | 2.188(5)  |

|                                              |            |                                            |            |
|----------------------------------------------|------------|--------------------------------------------|------------|
| O(25)-Cd(6) <sup>II</sup>                    | 2.439(12)  | O(26)-Cd(6) <sup>II</sup>                  | 2.316(13)  |
| O(4) <sup>I</sup> -Cd(1)-O(2)                | 90.3(2)    | O(4) <sup>I</sup> -Cd(1)-O(1)              | 132.0(2)   |
| O(2)-Cd(1)-O(1)                              | 55.18(18)  | O(4) <sup>I</sup> -Cd(1)-O(5) <sup>I</sup> | 53.8(2)    |
| O(2)-Cd(1)-O(5) <sup>I</sup>                 | 117.7(2)   | O(1)-Cd(1)-O(5) <sup>I</sup>               | 109.80(19) |
| O(24) <sup>II</sup> -Cd(2)-O(12)             | 86.24(18)  | O(24) <sup>II</sup> -Cd(2)-O(8)            | 90.96(18)  |
| O(12)-Cd(2)-O(8)                             | 145.68(16) | O(24) <sup>II</sup> -Cd(2)-O(7)            | 104.1(2)   |
| O(12)-Cd(2)-O(7)                             | 92.41(18)  | O(8)-Cd(2)-O(7)                            | 55.17(18)  |
| O(18)-Cd(3)-O(12)                            | 143.18(16) | O(18)-Cd(3)-O(23) <sup>II</sup>            | 92.50(16)  |
| O(12)-Cd(3)-O(23) <sup>II</sup>              | 83.96(17)  | O(18)-Cd(3)-O(13)                          | 90.59(16)  |
| O(12)-Cd(3)-O(13)                            | 52.68(14)  | O(23) <sup>II</sup> -Cd(3)-O(13)           | 86.86(17)  |
| O(18)-Cd(3)-O(17)                            | 53.45(16)  | O(12)-Cd(3)-O(17)                          | 113.73(17) |
| O(23) <sup>II</sup> -Cd(3)-O(17)             | 143.02(15) | O(13)-Cd(3)-O(17)                          | 80.33(18)  |
| O(9) <sup>I</sup> -Cd(4)-O(16)               | 94.2(2)    | O(9) <sup>I</sup> -Cd(4)-O(15)             | 148.5(2)   |
| O(16)-Cd(4)-O(15)                            | 54.61(15)  | O(21)-Cd(5)-O(29)                          | 111.1(2)   |
| O(21)-Cd(5)-O(28)                            | 74.5(2)    | O(29)-Cd(5)-O(28)                          | 52.0(2)    |
| O(21)-Cd(5)-O(20)                            | 51.8(3)    | O(29)-Cd(5)-O(20)                          | 86.1(3)    |
| O(28)-Cd(5)-O(20)                            | 91.3(3)    | O(26) <sup>I</sup> -Cd(6)-O(32)            | 139.2(4)   |
| O(26) <sup>I</sup> -Cd(6)-O(25) <sup>I</sup> | 51.6(5)    | O(32)-Cd(6)-O(25) <sup>I</sup>             | 127.4(4)   |
| O(26) <sup>I</sup> -Cd(6)-O(31)              | 86.4(3)    | O(32)-Cd(6)-O(31)                          | 54.4(2)    |
| O(25) <sup>I</sup> -Cd(6)-O(31)              | 88.1(4)    | O(9) <sup>I</sup> -Cd(4)-O(1W)             | 98.1(3)    |
| O(1W)-Cd(4)-O(16)                            | 102.8(3)   | O(1W)-Cd(4)-O(15)                          | 93.4(3)    |
| O(3W)-Cd(5)-O(21)                            | 126.0(2)   | O(3W)-Cd(5)-O(29)                          | 89.4(2)    |
| O(3W)-Cd(5)-O(28)                            | 141.3(2)   | O(3W)-Cd(5)-O(20)                          | 82.4(2)    |
| O(26) <sup>I</sup> -Cd(6)-O(2W)              | 130.1(4)   | O(2W)-Cd(6)-O(32)                          | 73.3(3)    |
| O(2W)-Cd(6)-O(25) <sup>I</sup>               | 78.9(5)    | O(2W)-Cd(6)-O(31)                          | 99.0(3)    |
| O(4) <sup>I</sup> -Cd(1)-N(1)                | 124.6(2)   | O(4) <sup>I</sup> -Cd(1)-N(2)              | 101.9(2)   |
| O(24) <sup>II</sup> -Cd(2)-N(3)              | 167.0(2)   | O(12)-Cd(2)-N(3)                           | 97.79(19)  |
| O(24) <sup>II</sup> -Cd(2)-N(4)              | 95.07(19)  | O(12)-Cd(2)-N(4)                           | 106.19(17) |
| O(8)-Cd(2)-N(4)                              | 108.13(16) | O(18)-Cd(3)-N(6)                           | 87.16(17)  |
| O(12)-Cd(3)-N(6)                             | 129.16(16) | O(18)-Cd(3)-N(5)                           | 129.98(17) |
| O(12)-Cd(3)-N(5)                             | 77.07(17)  | O(23) <sup>II</sup> -Cd(3)-N(5)            | 128.13(16) |
| O(9) <sup>I</sup> -Cd(4)-N(7)                | 109.3(2)   | O(1W)-Cd(4)-N(7)                           | 85.2(2)    |
| O(9) <sup>I</sup> -Cd(4)-N(8)                | 101.6(3)   | O(1W)-Cd(4)-N(8)                           | 153.0(3)   |
| O(16)-Cd(4)-N(8)                             | 94.2(2)    | O(15)-Cd(4)-N(8)                           | 79.28(19)  |
| O(3W)-Cd(5)-N(10)                            | 100.25(18) | O(21)-Cd(5)-N(10)                          | 126.8(2)   |
| O(3W)-Cd(5)-N(9)                             | 84.90(19)  | O(21)-Cd(5)-N(9)                           | 87.21(18)  |
| O(2W)-Cd(6)-N(12)                            | 87.3(3)    | O(26) <sup>I</sup> -Cd(6)-N(11)            | 80.5(3)    |
| O(2W)-Cd(6)-N(11)                            | 146.8(3)   | N(1)-Cd(1)-O(2)                            | 144.8(2)   |
| N(2)-Cd(1)-O(2)                              | 97.0(2)    | N(1)-Cd(1)-O(1)                            | 96.93(19)  |
| N(2)-Cd(1)-O(1)                              | 113.5(2)   | N(1)-Cd(1)-O(5) <sup>I</sup>               | 90.3(2)    |
| N(2)-Cd(1)-O(5) <sup>I</sup>                 | 135.1(2)   | N(3)-Cd(2)-O(8)                            | 92.54(19)  |
| N(3)-Cd(2)-O(7)                              | 88.2(2)    | N(4)-Cd(2)-O(7)                            | 154.16(18) |
| N(6)-Cd(3)-O(23) <sup>II</sup>               | 88.26(16)  | N(6)-Cd(3)-O(13)                           | 174.53(17) |
| N(5)-Cd(3)-O(13)                             | 116.10(17) | N(6)-Cd(3)-O(17)                           | 102.22(17) |

|                                       |            |                                |            |
|---------------------------------------|------------|--------------------------------|------------|
| N(5)-Cd(3)-O(17)                      | 88.40(15)  | N(7)-Cd(4)-O(16)               | 154.01(17) |
| N(7)-Cd(4)-O(15)                      | 100.73(17) | N(9)-Cd(5)-O(28)               | 132.1(2)   |
| N(9)-Cd(5)-O(29)                      | 160.4(2)   | N(9)-Cd(5)-O(20)               | 111.5(3)   |
| N(10)-Cd(5)-O(20)                     | 176.8(2)   | N(10)-Cd(5)-O(28)              | 85.44(18)  |
| N(10)-Cd(5)-O(29)                     | 92.0(2)    | N(11)-Cd(6)-O(32)              | 91.2(2)    |
| N(12)-Cd(6)-O(25) <sup>I</sup>        | 110.4(4)   | N(11)-Cd(6)-O(25) <sup>I</sup> | 131.7(4)   |
| N(12)-Cd(6)-O(31)                     | 161.4(2)   | N(11)-Cd(6)-O(31)              | 95.1(2)    |
| N(12)-Cd(6)-O(32)                     | 111.9(2)   | N(1)-Cd(1)-N(2)                | 73.2(2)    |
| N(3)-Cd(2)-N(4)                       | 71.94(19)  | N(6)-Cd(3)-N(5)                | 69.00(17)  |
| N(7)-Cd(4)-N(8)                       | 70.9(2)    | N(10)-Cd(5)-N(9)               | 70.72(16)  |
| N(12)-Cd(6)-N(11)                     | 71.13(19)  |                                |            |
| Symmetry code: I: x+1,y,z II: x-1,y,z |            |                                |            |

### 3-D

|                                             |            |                                             |            |
|---------------------------------------------|------------|---------------------------------------------|------------|
| Cd(1)-O(4) <sup>I</sup>                     | 2.199(3)   | Cd(1)-O(12)                                 | 2.250(3)   |
| Cd(1)-O(2)                                  | 2.278(3)   | Cd(1)-O(1)                                  | 2.524(4)   |
| Cd(2)-O(13)                                 | 2.236(4)   | Cd(2)-O(5) <sup>I</sup>                     | 2.247(3)   |
| Cd(2)-O(10) <sup>I</sup>                    | 2.318(3)   | Cd(2)-O(9) <sup>I</sup>                     | 2.382(3)   |
| O(4)-Cd(1) <sup>II</sup>                    | 2.199(3)   | O(5)-Cd(2) <sup>II</sup>                    | 2.247(3)   |
| O(9)-Cd(2) <sup>II</sup>                    | 2.382(3)   | O(10)-Cd(2) <sup>II</sup>                   | 2.318(3)   |
| Cd(1)-N(1)                                  | 2.328(3)   | Cd(1)-N(2)                                  | 2.341(3)   |
| Cd(2)-N(3)                                  | 2.331(4)   | Cd(2)-N(4)                                  | 2.341(4)   |
| O(4) <sup>I</sup> -Cd(1)-O(12)              | 94.98(14)  | O(4) <sup>I</sup> -Cd(1)-O(2)               | 98.88(12)  |
| O(12)-Cd(1)-O(2)                            | 98.28(13)  | O(4) <sup>I</sup> -Cd(1)-O(1)               | 96.61(13)  |
| O(12)-Cd(1)-O(1)                            | 151.15(12) | O(2)-Cd(1)-O(1)                             | 53.83(10)  |
| O(13)-Cd(2)-O(5) <sup>I</sup>               | 93.3(2)    | O(13)-Cd(2)-O(10) <sup>I</sup>              | 96.78(16)  |
| O(5) <sup>I</sup> -Cd(2)-O(10) <sup>I</sup> | 92.64(14)  | O(13)-Cd(2)-O(9) <sup>I</sup>               | 98.94(17)  |
| O(5) <sup>I</sup> -Cd(2)-O(9) <sup>I</sup>  | 146.51(13) | O(10) <sup>I</sup> -Cd(2)-O(9) <sup>I</sup> | 55.13(12)  |
| O(4) <sup>I</sup> -Cd(1)-N(1)               | 99.62(14)  | O(12)-Cd(1)-N(1)                            | 120.51(14) |
| O(2)-Cd(1)-N(1)                             | 134.90(11) | O(4) <sup>I</sup> -Cd(1)-N(2)               | 171.15(13) |
| O(12)-Cd(1)-N(2)                            | 86.70(12)  | O(2)-Cd(1)-N(2)                             | 89.45(12)  |
| O(13)-Cd(2)-N(3)                            | 169.27(16) | O(5) <sup>I</sup> -Cd(2)-N(3)               | 87.80(13)  |
| O(10) <sup>I</sup> -Cd(2)-N(3)              | 93.83(14)  | O(13)-Cd(2)-N(4)                            | 98.8(2)    |
| O(5) <sup>I</sup> -Cd(2)-N(4)               | 116.85(14) | O(10) <sup>I</sup> -Cd(2)-N(4)              | 145.51(13) |
| N(1)-Cd(1)-O(1)                             | 83.37(12)  | N(2)-Cd(1)-O(1)                             | 85.88(12)  |
| N(3)-Cd(2)-O(9) <sup>I</sup>                | 85.85(15)  | N(4)-Cd(2)-O(9) <sup>I</sup>                | 92.03(13)  |
| N(1)-Cd(1)-N(2)                             | 72.17(11)  | N(3)-Cd(2)-N(4)                             | 71.30(14)  |
| Symmetry code: I: x,y,z-1 II: x,y,z+1       |            |                                             |            |

### 3-L

|                          |          |                          |          |
|--------------------------|----------|--------------------------|----------|
| Cd(1)-O(13)              | 2.208(5) | Cd(1)-O(2)               | 2.250(6) |
| Cd(1)-O(15) <sup>I</sup> | 2.294(6) | Cd(1)-O(16) <sup>I</sup> | 2.521(7) |
| Cd(2)-O(3)               | 2.228(7) | Cd(2)-O(14)              | 2.253(6) |
| Cd(2)-O(8) <sup>II</sup> | 2.325(6) | Cd(2)-O(7) <sup>II</sup> | 2.399(7) |

|                                |          |                                              |          |
|--------------------------------|----------|----------------------------------------------|----------|
| O(7)-Cd(2) <sup>I</sup>        | 2.399(7) | O(8)-Cd(2) <sup>I</sup>                      | 2.325(6) |
| O(15)-Cd(1) <sup>II</sup>      | 2.294(6) | O(16)-Cd(1) <sup>II</sup>                    | 2.521(7) |
| Cd(1)-N(2)                     | 2.324(7) | Cd(1)-N(1)                                   | 2.342(7) |
| Cd(2)-N(3)                     | 2.354(8) | Cd(2)-N(4)                                   | 2.325(7) |
| O(13)-Cd(1)-O(2)               | 94.8(3)  | O(13)-Cd(1)-O(15) <sup>I</sup>               | 99.0(2)  |
| O(2)-Cd(1)-O(15) <sup>I</sup>  | 98.3(3)  | O(13)-Cd(1)-O(16) <sup>I</sup>               | 96.8(2)  |
| O(2)-Cd(1)-O(16) <sup>I</sup>  | 150.6(2) | O(15) <sup>I</sup> -Cd(1)-O(16) <sup>I</sup> | 53.2(2)  |
| O(3)-Cd(2)-O(14)               | 92.6(3)  | O(3)-Cd(2)-O(8) <sup>II</sup>                | 97.0(3)  |
| O(14)-Cd(2)-O(8) <sup>II</sup> | 92.5(3)  | O(3)-Cd(2)-O(7) <sup>II</sup>                | 99.8(3)  |
| O(14)-Cd(2)-O(7) <sup>II</sup> | 146.6(3) | O(8) <sup>II</sup> -Cd(2)-O(7) <sup>II</sup> | 55.5(2)  |
| O(13)-Cd(1)-N(2)               | 100.2(3) | O(2)-Cd(1)-N(2)                              | 120.7(3) |
| O(15) <sup>I</sup> -Cd(1)-N(2) | 134.4(2) | O(13)-Cd(1)-N(1)                             | 171.2(2) |
| O(2)-Cd(1)-N(1)                | 86.3(2)  | O(15) <sup>I</sup> -Cd(1)-N(1)               | 89.5(3)  |
| O(3)-Cd(2)-N(4)                | 169.4(3) | O(14)-Cd(2)-N(4)                             | 87.7(3)  |
| O(3)-Cd(2)-N(3)                | 99.9(3)  | O(14)-Cd(2)-N(3)                             | 116.7(3) |
| O(8) <sup>II</sup> -Cd(2)-N(3) | 145.2(3) | N(2)-Cd(1)-O(16) <sup>I</sup>                | 83.7(2)  |
| N(1)-Cd(1)-O(16) <sup>I</sup>  | 86.4(2)  | N(4)-Cd(2)-O(8) <sup>II</sup>                | 93.6(3)  |
| N(4)-Cd(2)-O(7) <sup>II</sup>  | 85.5(3)  | N(3)-Cd(2)-O(7) <sup>II</sup>                | 91.6(3)  |
| N(2)-Cd(1)-N(1)                | 72.0(2)  | N(4)-Cd(2)-N(3)                              | 70.6(3)  |

Symmetry code: I: x,y,z-1 II: x,y,z+1

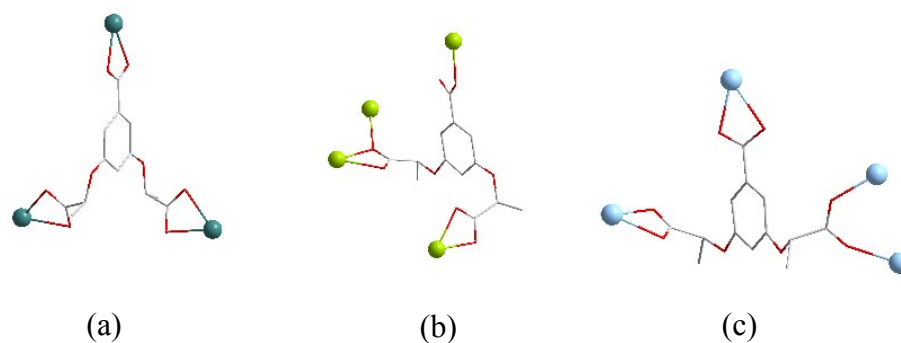

Figure S1. Coordination modes of (1S,2S)-H<sub>3</sub>cpba ligands in **2-L**.

## Section 2. General characterizations

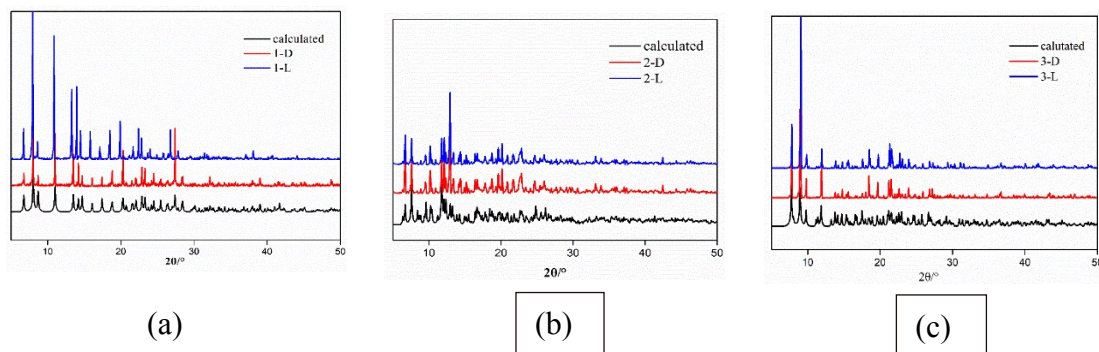

Figure S2. PXRD patterns of CPs **1-3**.



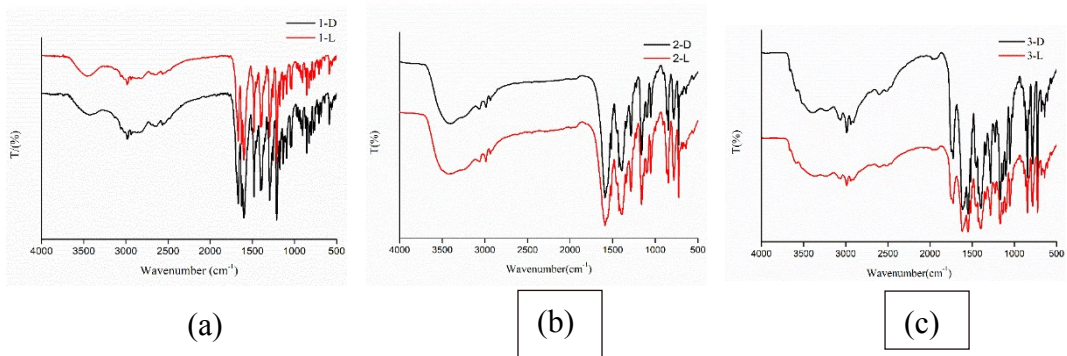

Figure S3. The IR spectra of CPs **1-3**.

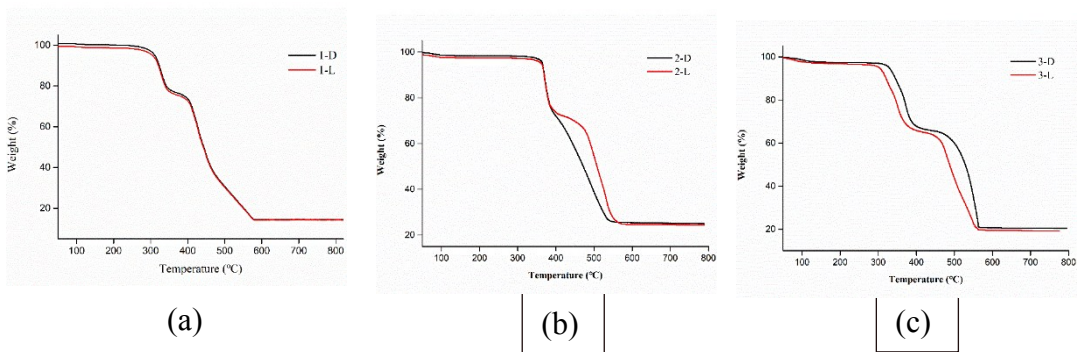

Figure S4. TGA curves of CPs **1-3**.

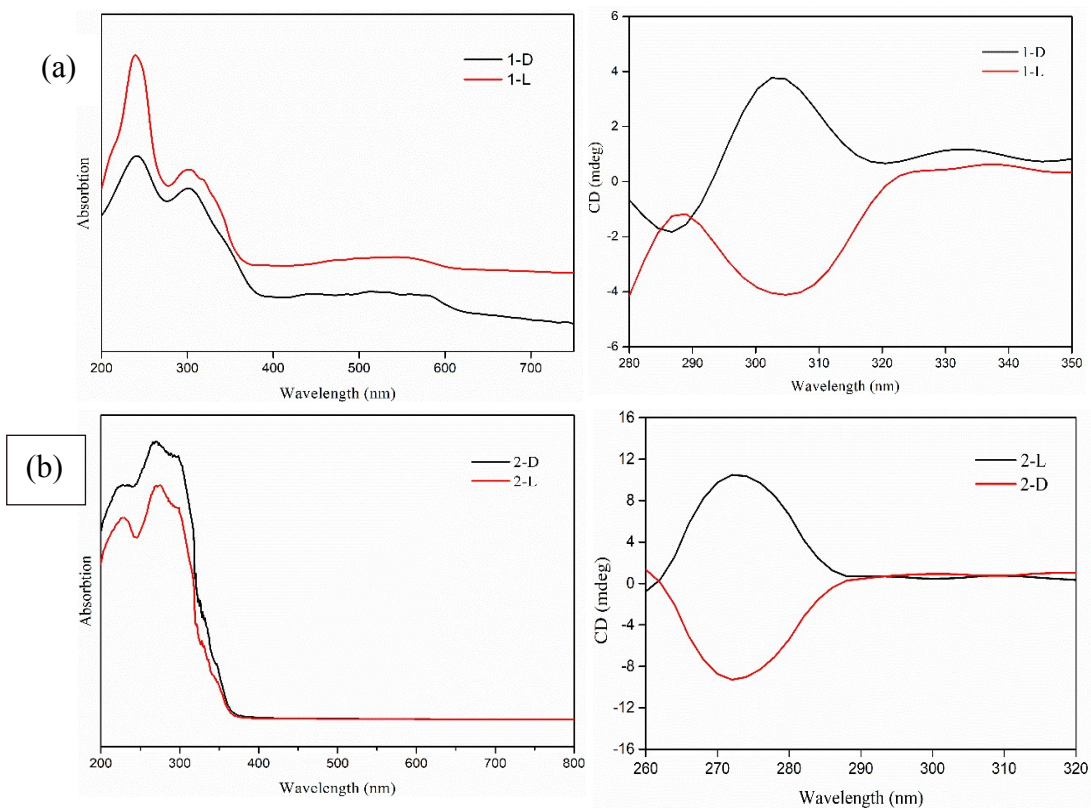

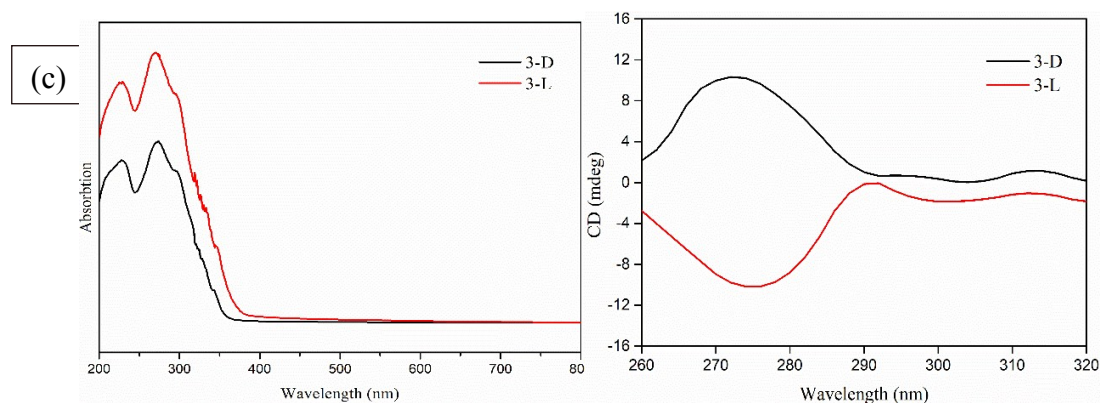

Figure S5. Solid-state UV/vis curves and circular dichroism of CPs **1-3**.

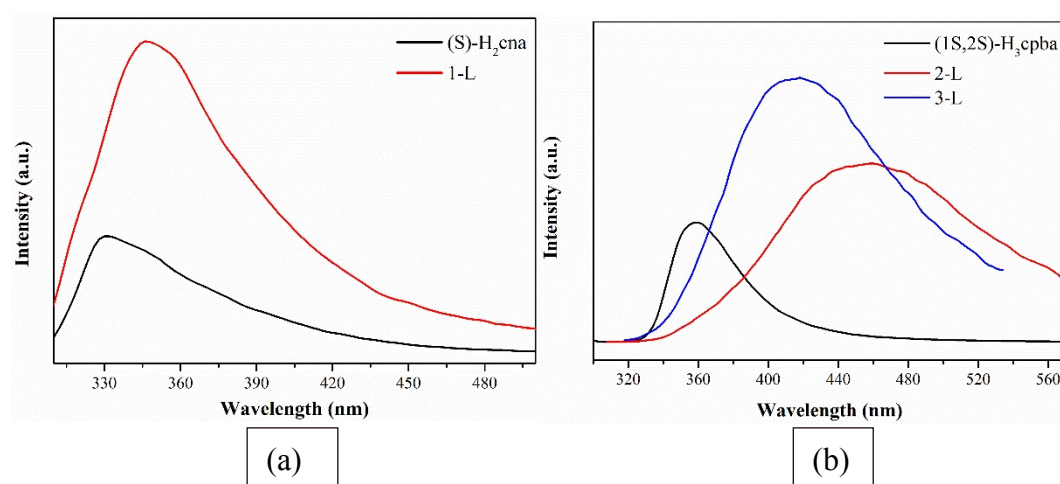

Figure S6. Solid-state photoluminescent spectra of free ligands and CPs **1-3**.

### Section 3. Detection of antibiotics

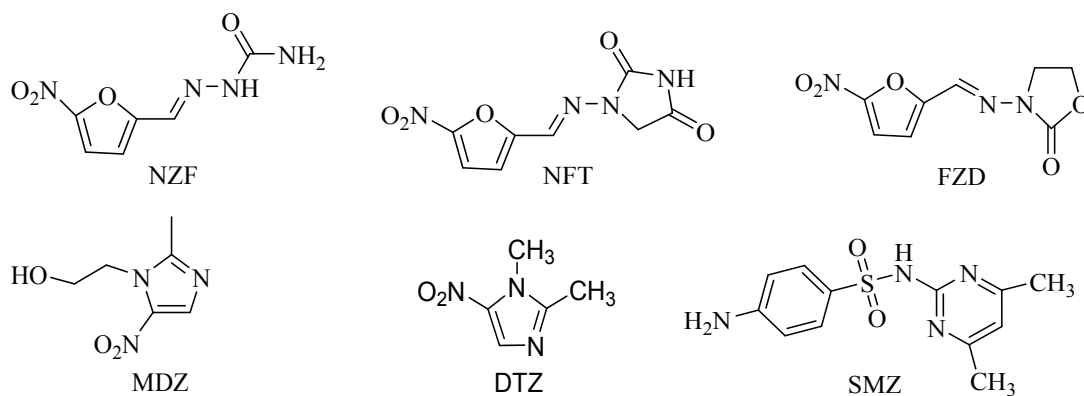

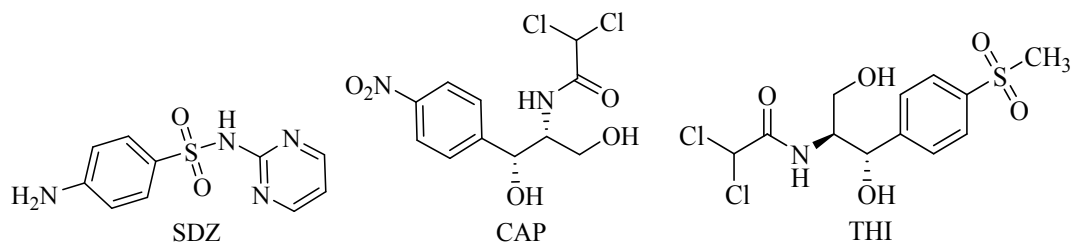

Figure S7. Chemical structures of the explored antibiotics.

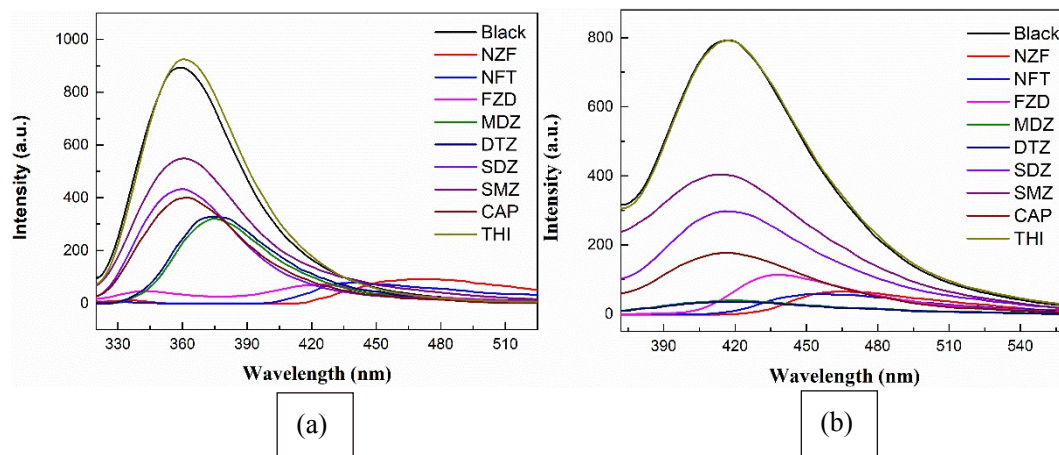

Figure S8. Luminescence intensities of 1-L, 3-L with the presence of 0.10 mM, 0.33 mM different antibiotics.

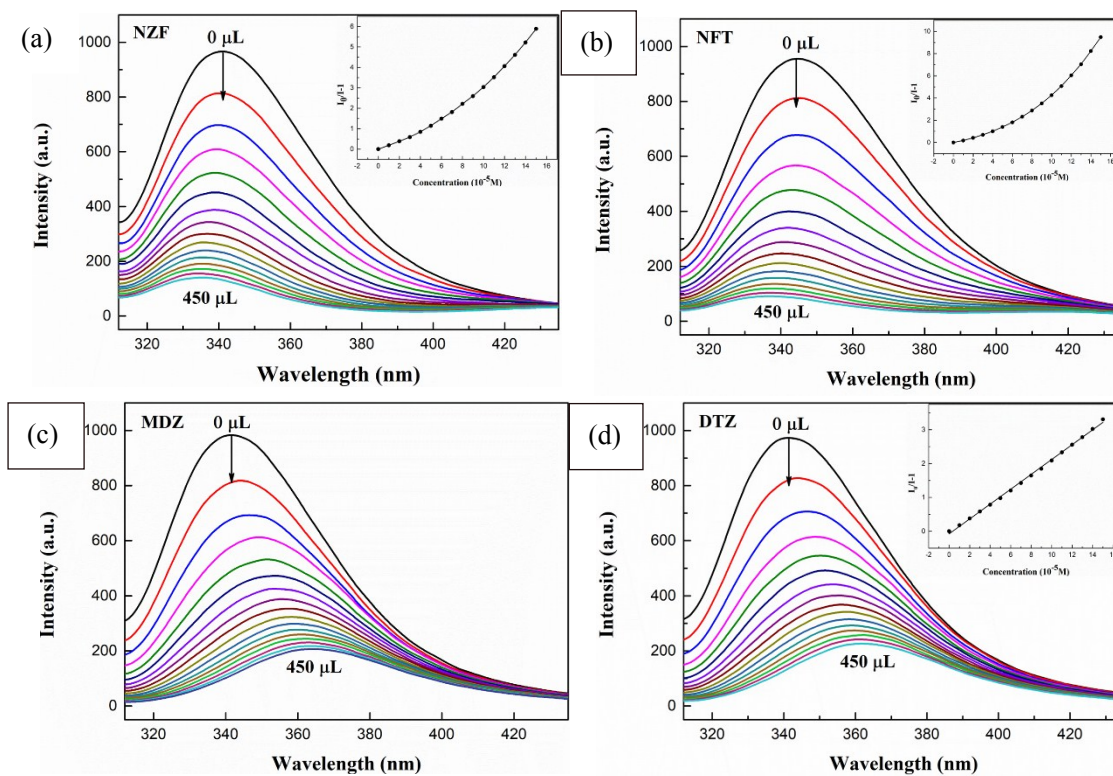

Figure S9. Effect on the fluorescence spectra of **1-L** dispersed in DMF upon the incremental addition of 450  $\mu\text{L}$  (1 mM, 30  $\mu\text{L}$  addition each time) of NZF (a), NFT (b), MDZ(c) and DTZ(d) respectively (inset: SV plots of corresponding antibiotic).

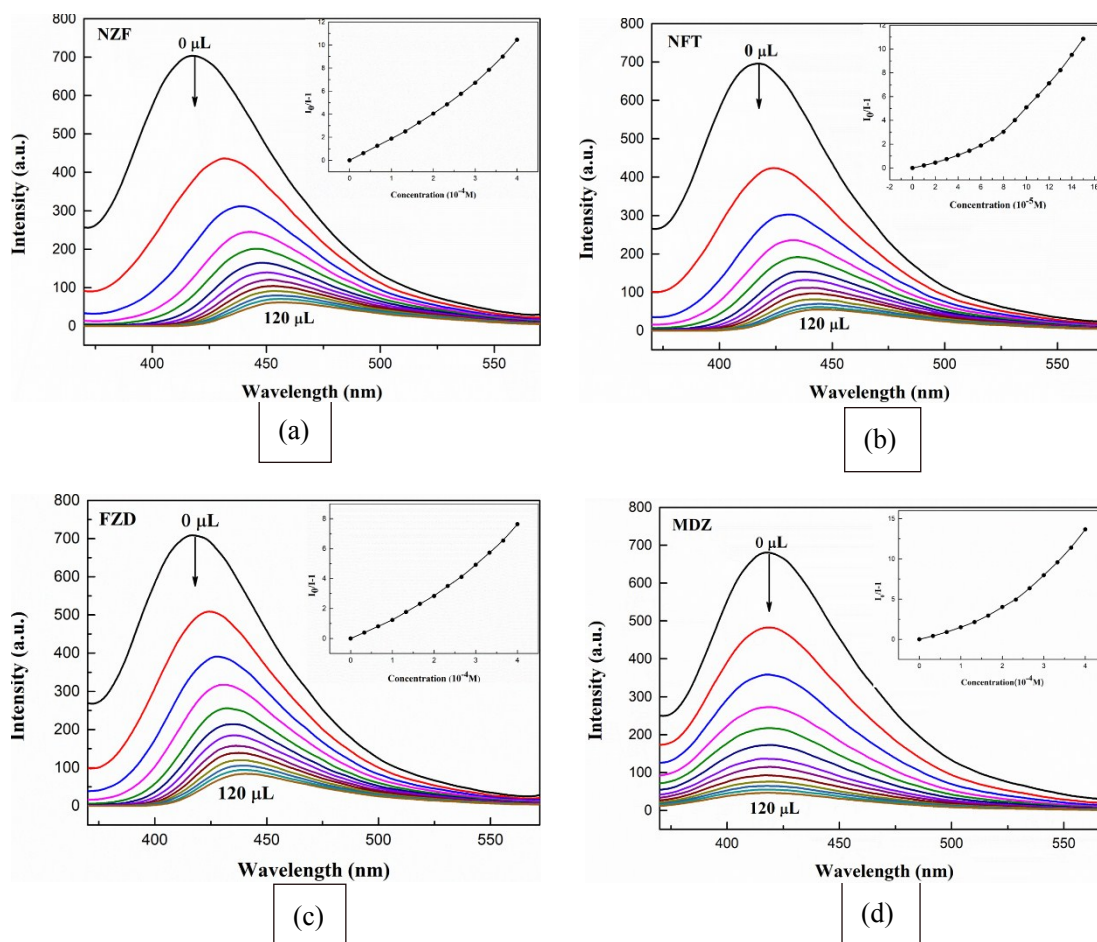

Figure S10. Effect on the fluorescence spectra of **3-L** dispersed in DMF upon the incremental addition of 120  $\mu\text{L}$  (10 mM, 10  $\mu\text{L}$  addition each time) of NZF (a), NFT (b), FZD (c) and MDZ (d) respectively (inset: SV plots of corresponding antibiotic).

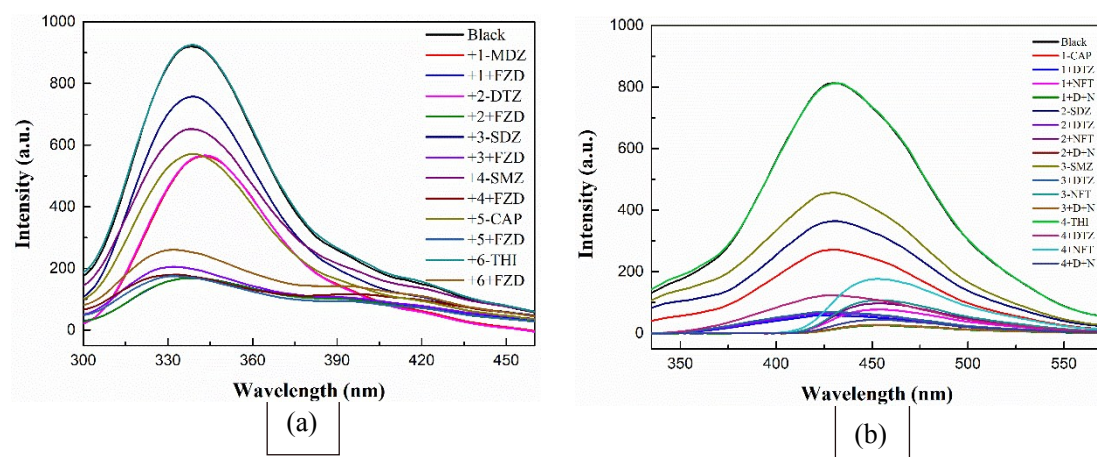

Figure S11. (a) Tracked emission spectra of a mixture of **1-L** and competing antibiotics (0.05 mM) upon the addition of FZD (0.05 mM). (b) Tracked emission spectra a

mixture of **3-L** and competing antibiotics (0.26 mM) and continuing to add NFT (0.26 mM) or MDZ (0.26 mM), and following to add MDZ (0.26 mM) or NFT (0.26 mM).

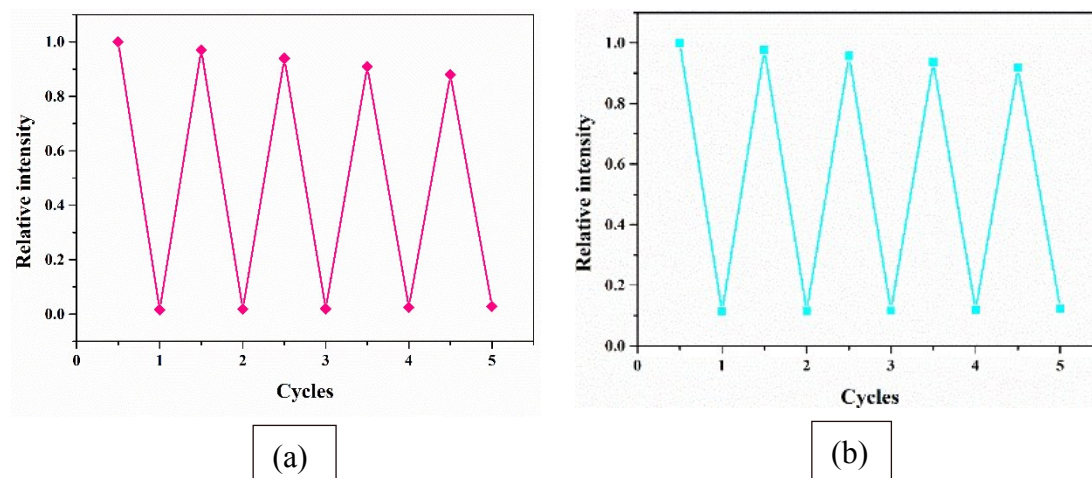

Figure S12. Recyclability test of (a) **1-L** and (b) **3-L** toward detecting the each best antibiotics.

#### Section 4. Detection of pesticides

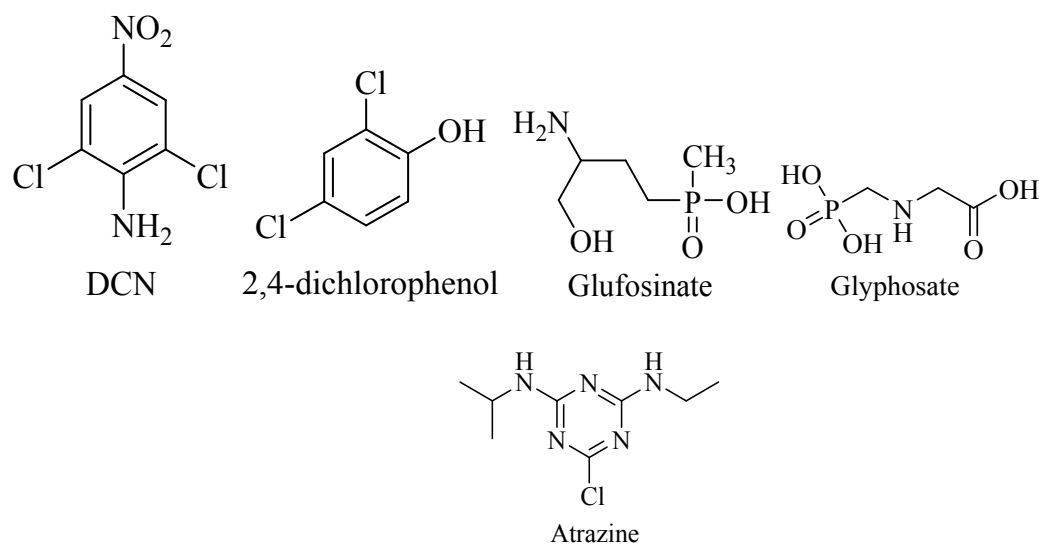

Figure S13. Chemical structures of the explored antibiotics.

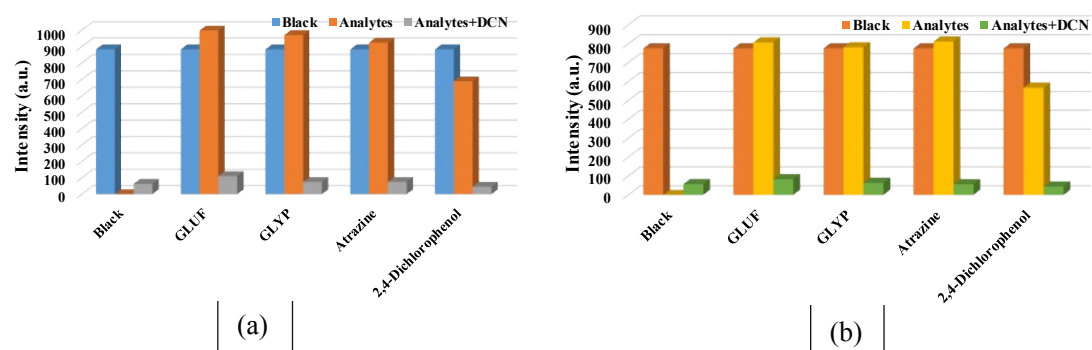

Figure S14. Tracked emission spectra of **1-L** (a), **3-L** (b) toward the competing pesticides (0.33 mM) or a mixture of competing pesticides (0.33 mM) and DCN (0.33 mM)

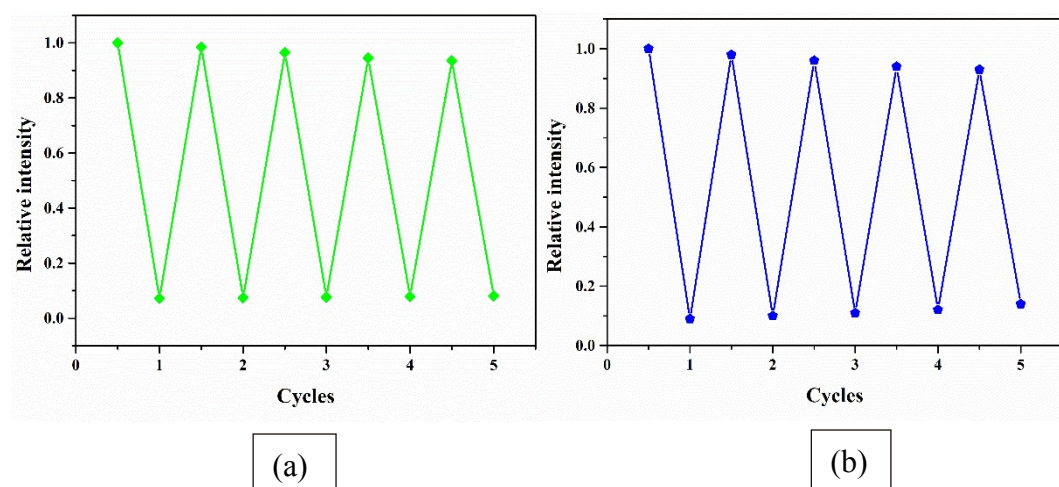

Figure S15. Recyclability test of (a) **1-L** and (c) **3-L** toward detecting DCN.

Table S3  $K_{SV}$  and detection limits of **1-L**, **3-L** for identifiable substance

| Quenchers                                                                                  | $K_{sv}$ ( $M^{-1}$ )                    |                                          | Detection limit (ppb) |            |
|--------------------------------------------------------------------------------------------|------------------------------------------|------------------------------------------|-----------------------|------------|
|                                                                                            | <b>1-L</b>                               | <b>3-L</b>                               | <b>1-L</b>            | <b>3-L</b> |
| 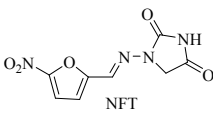<br>NFT | $2.5077 \times 10^4$<br>( $R^2=0.9848$ ) | $2.4274 \times 10^4$<br>( $R^2=0.9864$ ) | 313                   | 353        |
| <br>NZF | $2.2524 \times 10^4$<br>( $R^2=0.9890$ ) | $2.2115 \times 10^4$<br>( $R^2=0.9928$ ) | 290                   | 322        |
| <br>FZD | $2.8752 \times 10^4$<br>( $R^2=0.9865$ ) | $1.5465 \times 10^4$<br>( $R^2=0.9919$ ) | 227                   | 461        |
| <br>MDZ | ---                                      | $1.7588 \times 10^4$<br>( $R^2=0.9832$ ) | ---                   | 350        |
| <br>DTZ | ---                                      | $2.1745 \times 10^4$<br>( $R^2=0.9839$ ) | ---                   | 233        |
| <br>DCN | $3.0724 \times 10^4$<br>( $R^2=0.9938$ ) | $1.2084 \times 10^4$<br>( $R^2=0.9847$ ) | 222                   | 616        |

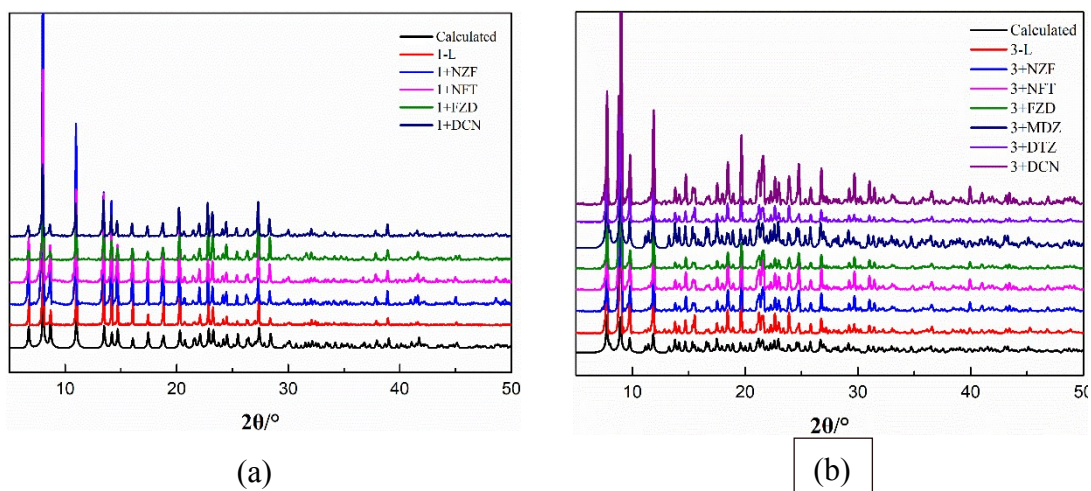

Figure S16. Powder X-Ray patterns for 1-L (a) and 3-L (b) before/after adding identifiable substances.

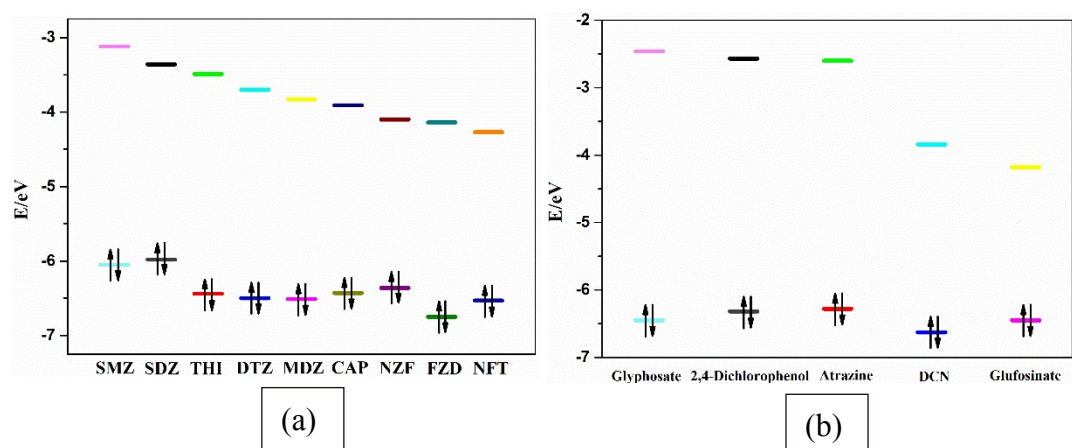

Figure S17. HOMO and LUMO energies of the selected antibiotics (a) and pesticides (b) tested by electrochemical method.

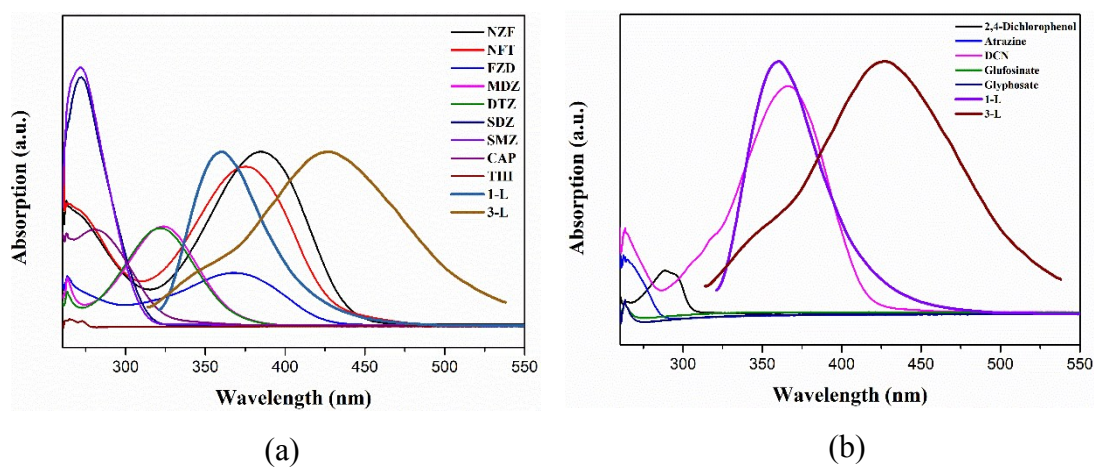

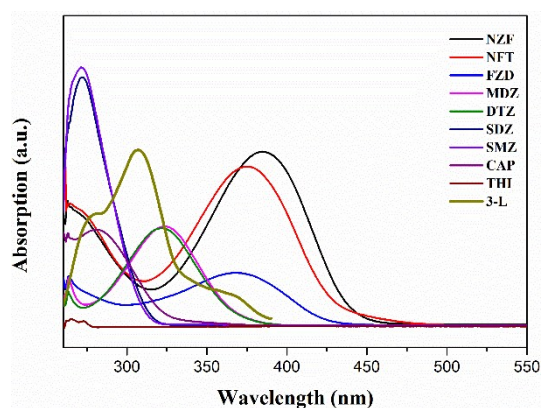

(c)

Figure S18. UV-vis absorption spectra of selected antibiotics (0.1 mM) (a), pesticides (0.1 mM) (b) and the normalized emission spectra of **1-L**, **3-L** in DMF. (c) UV-vis absorption spectra of selected antibiotics (0.1 mM) and the normalized excitation spectra of **3-L** in DMF.

## Section 5. Detection of chiral nitro aromatic compounds

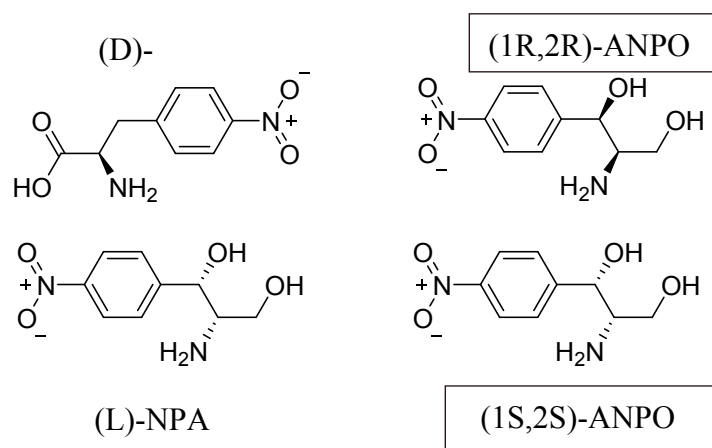

Figure S19. Chemical structures of the explored chiral nitro aromatic compounds.

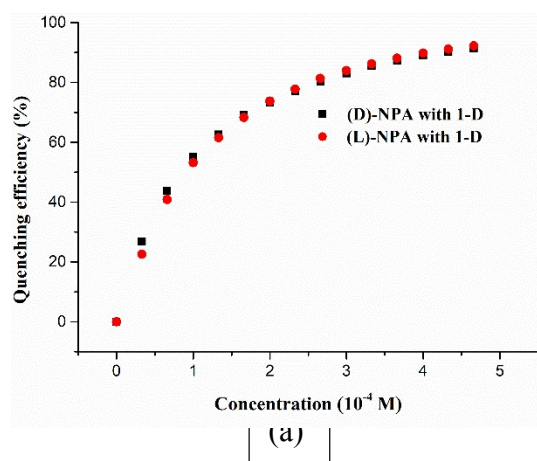

(a)

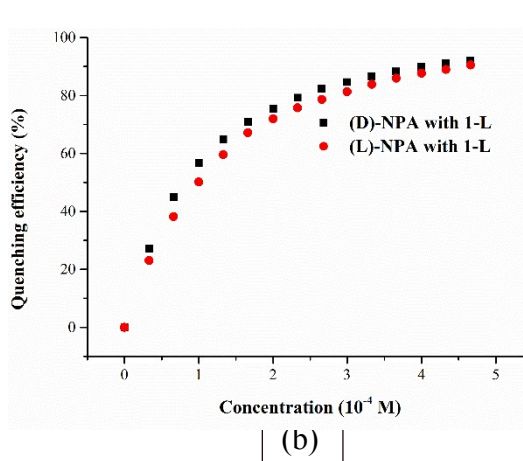

(b)



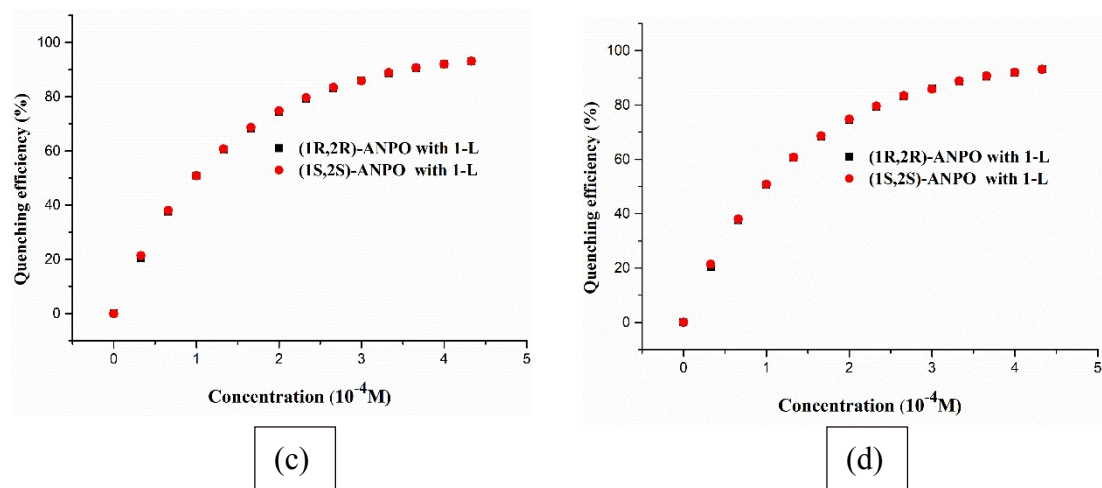

Figure S20. Luminescence quenching efficiency of (D/L)-NPA toward **1-D** (a) and **1-L** (b). Luminescence quenching efficiency of (1R,2R/1S,2S)-ANPO toward **1-D** (c) and **1-L** (d).

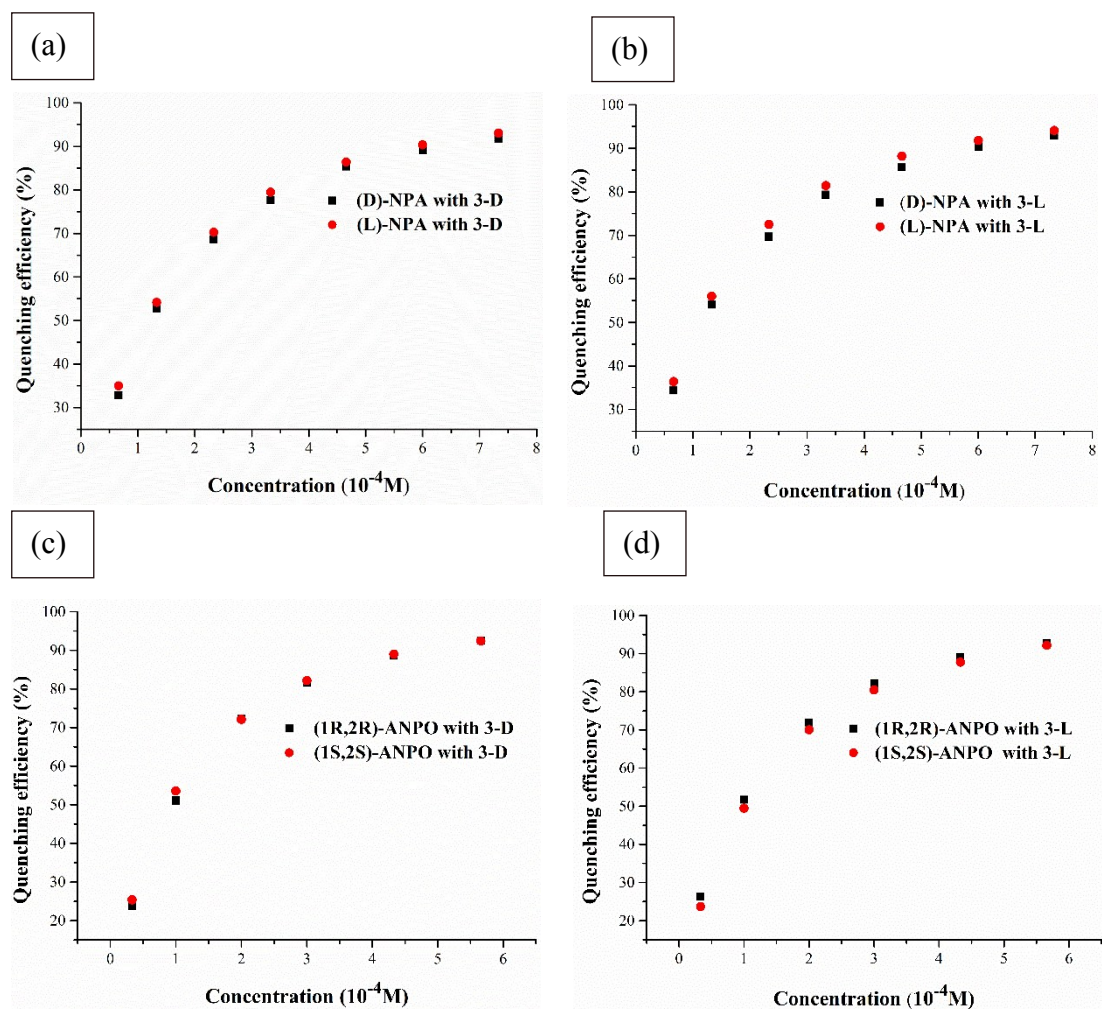

Figure S21. Luminescence quenching efficiency of (D/L)-NPA toward **3-D** (a) and **3-L** (b). Luminescence quenching efficiency of (1R,2R/1S,2S)-ANPO toward **3-D** (c) and **3-L** (d).

L (b). Luminescence quenching efficiency of (1R,2R/1S,2S)-ANPO toward **3-D** (c) and **3-L** (d).

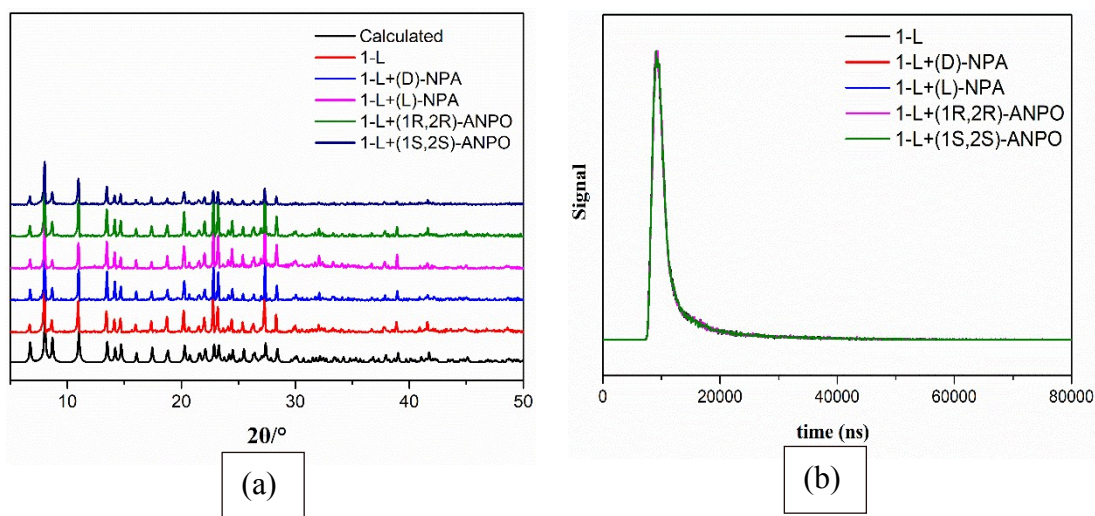

Figure S22. Powder X-Ray patterns and emission attenuation curve for **1-L** before/after adding identifiable substances.

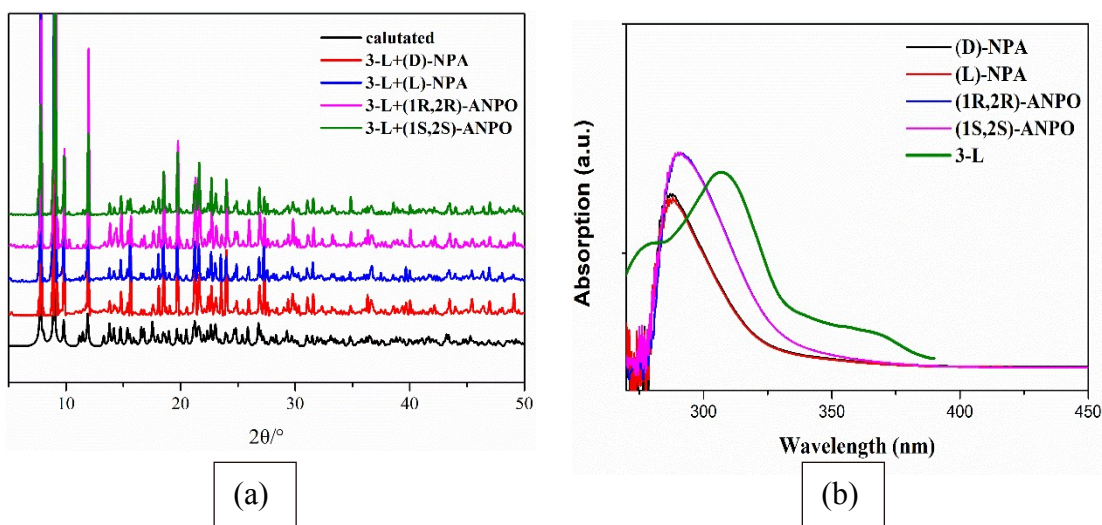

Figure S23. Powder X-Ray patterns and UV-vis absorption spectra and the normalized excitation spectra for **3-L** before/after adding identifiable substances.
